# Supplementary figures and images for: Photocatalytic production of H2O2 over facet-dependent Ti-MOF
Source: Royal Society of Chemistry journal article supplement (doi:10.1039/d1cy02166d), 2021-12-22

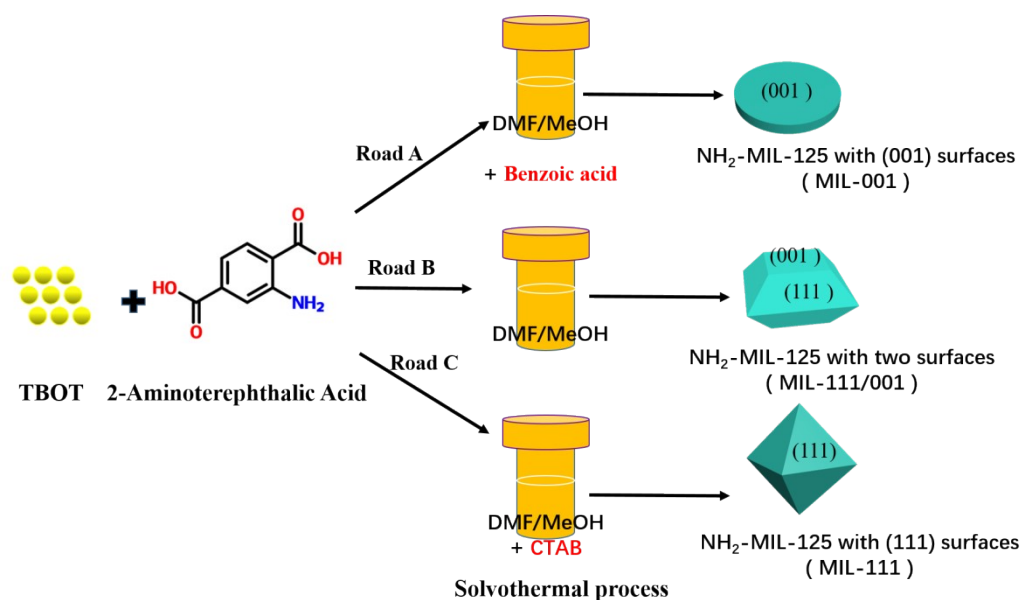

**Fig. S1.** Prepared process of Ti-MOFs

Supplement: d1cy02166d1.pdf [file d1cy02166d1.pdf]
